# Supplementary material for: Estrogen related receptor alpha in castration-resistant prostate cancer cells promotes tumor progression in bone
Source: PubMed Central journal article supplement (PMC5363569; doi:10.18632/oncotarget.12787), 2016-10-20
Supplement: oncotarget-07-77071-s001.pdf [file oncotarget-07-77071-s001.pdf]

## Estrogen related receptor alpha in castration-resistant prostate cancer cells promotes tumor progression in bone

### Supplementary Materials

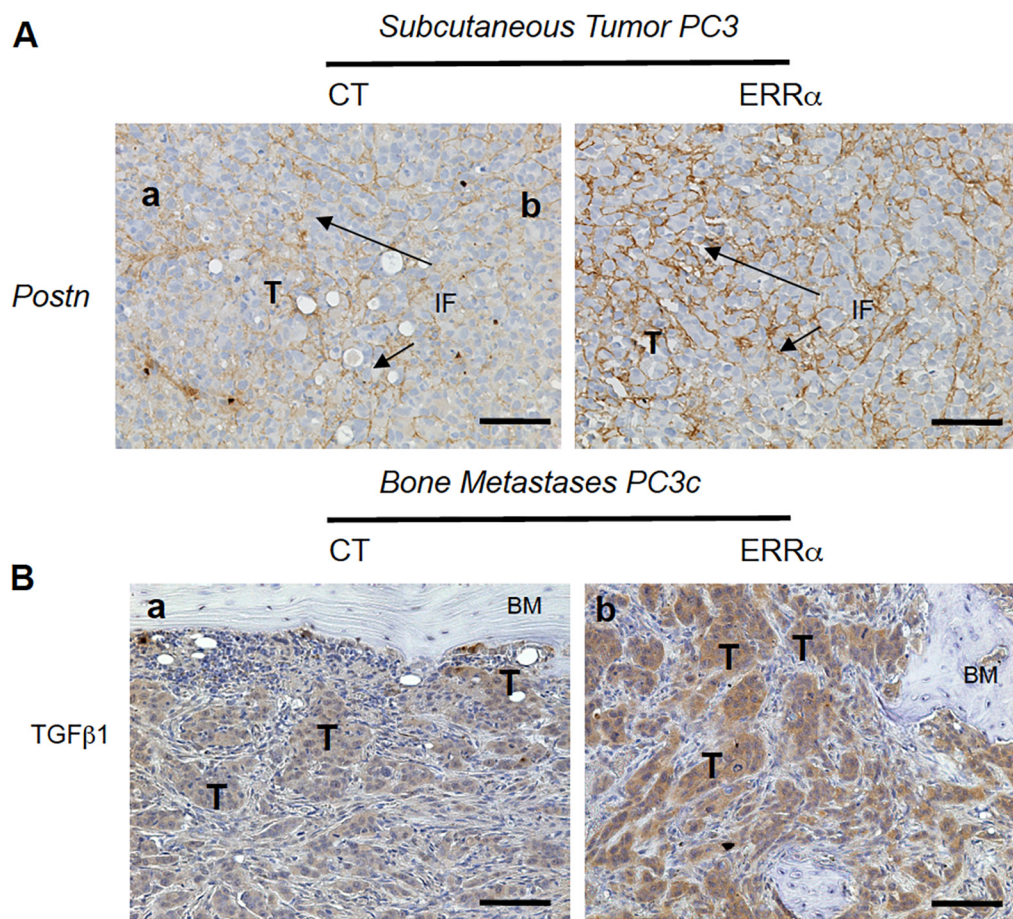

**Supplementary Figure S1:** (A) Immunohistochemistry showing the stimulation of *postn* in IF in SC tumor in PC3-ERR $\alpha$  (b) compared to PC3-CT (a). (B) Reinforcing the PC3 model, *TGF $\beta$ 1* protein expression level was also up-regulated in tumor *in vivo* in bone lesions induced by PC3c-ERR $\alpha$  (ERR $\alpha$ )(b) compared PC3c-CT (CT) cells (a). Bar = 200  $\mu$ m, T: Tumor; BM: Bone Matrix; IF: infiltrating fibroblasts.

**Supplementary Table S1: General information on the public datasets used for meta-analysis on *ERRα* in CRPC (Figure 1A–1C) and to obtain correlation between *ERRα* and *VEGFA*, *WNT5A*, *POSTN* and *TGFβ1* expression levels in bone metastases (GSE29650, GSE41619 and GSE74685) and/or in primary CRPC tumor (GSE1034, GSE6919 and GSE2269)**

| Database | Description                                                                                                                                                                                                                                                                                    | Analysis Platform                                       | Number of samples (N) |                 |                 |                 |
|----------|------------------------------------------------------------------------------------------------------------------------------------------------------------------------------------------------------------------------------------------------------------------------------------------------|---------------------------------------------------------|-----------------------|-----------------|-----------------|-----------------|
|          |                                                                                                                                                                                                                                                                                                |                                                         | Primary tumour        | Adjacent/stroma | Normal Prostate | Bone Metastases |
| GSE21034 | Human primary and metastatic prostate cancer samples and control normal adjacent benign prostate. CRPC samples are defined by biochemical recurrence and metastases. <sup>24</sup>                                                                                                             | Affymetrix Human Exon 1.0 ST Array                      | 150                   | 29              | N/A             | N/A             |
| GSE6919  | Patients with androgen-insensitive prostate cancer and normal prostate tissue from organ donors and adjacent tissue. <sup>25</sup>                                                                                                                                                             | Affymetrix Human Genome U95C Array and Version 2 Array  | 65                    | 63              | 18              | N/A             |
| GSE32269 | Primary prostate cancer tissue from patients with bone metastatic and localised disease. PCa samples are defined as AR positive (PCa) or AR negative (CRPC) based on the presence of (bone) metastases. No bone metastases were collected, only primary tumour tissue available. <sup>26</sup> | Affymetrix Human Genome U133A Array                     | 51                    | N/A             | 4               | N/A             |
| GSE29650 | Bone metastases were obtained from CRPC patients. <sup>34</sup>                                                                                                                                                                                                                                | Illumina HumanHT-12 V3.0 expression beadchip            | N/A                   | N/A             | N/A             | 30              |
| GSE41619 | Osteoblastic and osteolytic bone metastases from patients with CRPC. <sup>35</sup>                                                                                                                                                                                                             | Agilent-016162 PEDB Whole Human Genome Microarray 4x44K | N/A                   | N/A             | N/A             | 14              |
| GSE74685 | Metastases collected from autopsies of patients who died from metastatic CRPC. <sup>36</sup>                                                                                                                                                                                                   | Agilent-016162 PEDB Whole Human Genome Microarray 4x44K | N/A                   | N/A             | N/A             | 20              |

**Supplementary Table S2: SiRNA sequences and human and mouse primers and PCR using conditions**

**ERRa-SiRNA** GGCCUUCGCUGAGGACUUA – GCGAGAGGAGUAUGUUCUA - GGGUGGGCAUGCUC AAGGA

**Control** UGGUUUACAUGUCGACUAA – UGGUUUACAUGUUGUGUGA - UGGUUUACAUGUUUCCUA

| Gene Human | Primers (PCR)                                   | PCR cycles | T (°C) | Size (bp) | Reference      |
|------------|-------------------------------------------------|------------|--------|-----------|----------------|
| L32        | CAAGGAGCTGGAAGTGCTGC<br>CAGCTCTTTCCACGATGGC     | 25         | 64     | 100       | NM_000994.3    |
| ERRa       | GGAGGCCCCCGGAAGACAGC<br>TCACAGAGGGTAGCCACGGCT   | 40         | 65     | 134       | NM_001282451.1 |
| WNT5A      | GCAGGACGGTGTACAACCTGGC<br>AGCCGCATGGCCGCCGCGCTG | 40         | 62     | 153       | NM_003392.4    |
| VEGF-A     | AGGAGGAGGGCAGAATCA<br>TCTATCTTTCTTTGGTCTGCATT   | 30         | 60     | 315       | NM_001025366.2 |
| TGFb1      | AGAAGCGGTACCTGAACCCG<br>GCCGGTAGTGAACCCGTTG     | 30         | 57     | 303       | NM_000660.5    |

| Mouse | Primers (PCR)                                                    | PCR cycles | T (°C) | Size (bp) | Reference      |
|-------|------------------------------------------------------------------|------------|--------|-----------|----------------|
| L32   | CAAGGAGCTGGAGGTGCTGC<br>CTGCTCTTTCTACAATGGC                      | 30         | 59     | 100       | NM_172086      |
| rankl | GTGGTCTGCAGGATCGCTCTG<br>CGCTGGGCCACATCCAACC                     | 40         | 63     | 286       | NM_011613.3    |
| opg   | TGTGTGACAAATGTGCTCC<br>GTCTCACCTGAGAAGAACCC                      | 35         | 59     | 340       | NM_008764.3    |
| trap  | TTCCTCCAGGATGGATTCATGG<br>CTGAAGATACTGCAGGTTGTGG                 | 40         | 61     | 760       | NM_001102405.1 |
| ck    | TTAATTTGGGAGAAAAACCT<br>AGCCGCCTCCACAGCCATAAT                    | 40         | 56     | 400       | NM_007802.4    |
| call  | GTCATCTGATGGCCAGGG<br>TAGCGGCTGAGCTGGACGCC                       | 40         | 59     | 489       | NM_009801.4    |
| rank  | TGCTCCTCTTCATCTCTGTGGTAGTAGTGG<br>TGGAGTGAAGTCTGCGCCCCACCCTGCTCC | 40         | 61     | 1995      | NM_009399.3    |
| alp   | CCCGAATCCTTAAGGGCCAG<br>TATGCGATGTCCTTGCAGC                      | 35         | 59     | 409       | NM_007431.3    |
| bsp   | TGCCTACTTTTATCCTCCTCTG<br>ACCCGAGAGTGTGGAAAGTG                   | 40         | 59     | 201       | XM_011252013   |
| ocn   | TGACAAAGCCTTCATGTCCA<br>GAGAGGACAGGGAGGATCAA                     | 40         | 59     | 276       | NM_007541.3    |
| postn | AATGCTGCCCTGGCTATATG<br>GTAGTGGCTCCACAATGC                       | 40         | 55     | 103       | NM_015784.3    |
